# Supplementary material
Source: publisher figshare collection journal article supplement (https://gsajournals.figshare.com/ndownloader/files/14349398)
Supplement: Supplementary file 1 [file 14349398]

## Sheet: Genes Tested
Table S1. Clones used, genes tested, and effects on canals for RNAi screen.								Duplicates: Genes tested from 2 separate clones	Genes causing a Canal Phenotype-high confidence	Genes causing a Canal Phenotype-lesser confidence	Possible Canal Phenotype	No Phenotype	Suppressor genes	Not Attempted (no bact growth)	Controls	Sum of all clones (excluding duplicates)
Gene Number	Gene	Linkage Group	Ahringer bacteral clone ID	Gene ID	Tested/ not Tested	Results for tested genes	Total:	22	18	6	4	182	2	10	7	222
1	Y47H9C.2	I	I-10A19	dhhc-2	Tested	Prob. Canal Phenotype				1
2	C07F11.2	I	I-1E21		Tested	No Canal Phenotype						1
3	Y8G1A.2	I	I-1H11	inx-13	Tested	Canal Phenotype			1
4	ZK770.3	I	I-1H15	inx-12	Tested	Canal Phenotype			1
5	F57C9.1	I	I-2K08		Tested	No Canal Phenotype						1
6	T23B3.2	I	I-3C08		Tested	No Canal Phenotype						1
7	H32K16.1	I	I-4F01	slc-36.4	Tested	No Canal Phenotype						1
8	F36H2.1	I	I-4H03	tat-5	Tested	No Canal Phenotype						1
9	F26E4.2	I	I-4J18		Tested	No Canal Phenotype						1
10	K02B12.1	I	I-4M15	ceh-6	Tested	Canal Phenotype			1
11	C34B2.11	I	I-5K08		Tested	No Canal Phenotype						1
12	F36D1.7	I	I-5L19		Tested	No Canal Phenotype						1
13	Y18D10A.23	I	I-6D07		Tested	No Canal Phenotype						1
14	Y18D10A.8	I	I-6D19	mxt-1	Tested	Canal Phenotype			1
15	R05D7.5	I	I-6I03		Tested	No Canal Phenotype						1
16	Y105E8A.22	I	I-9C17	exc-4	Control	Canal Phenotype									1
17	F36F2.7	I	I-9M12		Tested	No Canal Phenotype						1
18	C32D5.6	II	II-10F06		Tested	No Canal Phenotype						1
18	C32D5.6	II	II-4N21		Tested	No Canal Phenotype		1	-	-	-	-	-	-	-
19	K08A2.1	II	II-10H01		Tested	No Canal Phenotype						1
20	C30B5.6	II	II-10M15		Tested	No Canal Phenotype						1
20	C30B5.6	II	II-4J13		No Bacterial Growth	Not Attempted		1	-	-	-	-	-	-	-
21	C01B12.3	II	II-1A07	best-3	Tested	Canal Phenotype			1
22	C01B12.5	II	II-1A09	best-4	Tested	Possible Canal Phenotype					1
22	C01B12.5	II	II-1A11	best-4	Tested	Possible Canal Phenotype		1	-	-	-	-	-	-	-
23	F23F1.6	II	II-1C05		Tested	No Canal Phenotype						1
24	Y57G7A.1	II	II-1F06		No Bacterial Growth	Not Attempted								1
25	K12H6.6	II	II-2F22		No Bacterial Growth	Not Attempted								1
26	F12A10.7	II	II-4O02	suex-1	Tested	Suppressor for exc-5							1
27	E04F6.4	II	II-5B09		Tested	No Canal Phenotype						1
28	E04F6.8	II	II-5B17		Tested	No Canal Phenotype						1
29	B0252.3	II	II-5E06		Tested	No Canal Phenotype						1
30	C06A8.8	II	II-5H02		Tested	No Canal Phenotype						1
31	T09A5.2	II	II-5H18	klp-3	Tested	No Canal Phenotype						1
31	T09A5.2	II	II-5H24	klp-3	Tested	No Canal Phenotype		1	-	-	-	-	-	-	-
32	D1022.3	II	II-5J23		Tested	No Canal Phenotype						1
33	T19D12.3	II	II-5K01		Tested	No Canal Phenotype						1
34	T19D12.7	II	II-5K09	oig-8	Tested	No Canal Phenotype						1
35	T19D12.9	II	II-5K13		Tested	Prob. Canal Phenotype				1
36	T19D12.10	II	II-5K15		Tested	No Canal Phenotype						1
37	DH11.3	II	II-5L24	pgp-11	Tested	No Canal Phenotype						1
38	T05C12.5	II	II-6C11	mig-5	Tested	No Canal Phenotype						1
38	T05C12.5	II	II-6C13	mig-5	Tested	No Canal Phenotype		1	-	-	-	-	-	-	-
39	F35C11.4	II	II-6E19		Tested	No Canal Phenotype						1
40	T26C5.1	II	II-6J13	gst-13	Tested	No Canal Phenotype						1
41	Y53C12A.2	II	II-6N18	glt-5	Tested	Possible Canal Phenotype					1
42	Y53C12A.4	II	II-6N22	mop-25.2	Tested	Canal Phenotype			1
43	C05D12.1	II	II-7D20		Tested	No Canal Phenotype						1
44	W02B12.4	II	II-7F20		Tested	No Canal Phenotype						1
45	R03D7.6	II	II-7H21	gst-5	Tested	No Canal Phenotype						1
46	F45E10.1	II	II-7J23	unc-53	No Bacterial Growth	Not Attempted								1
47	C14A4.11	II	II-7M10	ccm-3	Tested	No Canal Phenotype						1
48	C14A4.12	II	II-7M12		Tested	No Canal Phenotype						1
49	F13D12.3	II	II-7P22		Tested	No Canal Phenotype						1
50	F13D12.8	II	II-8A07		Tested	No Canal Phenotype						1
51	Y38E10A.7	II	II-8M20	lips-15	No Bacterial Growth	Not Attempted								1
52	K02B7.3	II	II-9C02		Tested	No Canal Phenotype						1
53	Y53F4B.2	II	II-9I08	elo-9	No Bacterial Growth	Not Attempted								1
54	Y53F4B.31	II	II-9O06	gst-28	Tested	Prob. Canal Phenotype				1
55	M01F1.5	III	III-1F02	hmit-1.3	Tested	No Canal Phenotype						1
56	C46F11.2	III	III-1H04	gsr-1	Tested	Prob. Canal Phenotype				1
57	F58B6.2	III	III-1K06	inft-1/exc-6	Control	Canal phenotype									1
58	C44F1.3	III	III-1L02	lec-4	Tested	No Canal Phenotype						1
59	C09F5.1	III	III-1M19		Tested	Possible Canal Phenotype					1
60	H09G03.1	III	III-1P09		Tested	Prob. Canal Phenotype				1
61	B0285.6	III	III-2M07		Tested	No Canal Phenotype						1
62	R07E5.7	III	III-2O13		Tested	No Canal Phenotype						1
63	ZC155.1	III	III-2P15	nex-1	Tested	No Canal Phenotype						1
64	ZK418.5	III	III-3B10		Tested	No Canal Phenotype						1
65	R13F6.3	III	III-3H21	srv-1	Tested	No Canal Phenotype						1
66	C05D11.5	III	III-3M02		Tested	No Canal Phenotype						1
67	F11H8.4	III	III-3P11	cyk-1	Tested	Canal Phenotype			1
68	F44B9.9	III	III-4A16		Tested	Possible Canal Phenotype					1
69	K12H4.1	III	III-4A18	pros-1	Tested	No Canal Phenotype						1
70	R13A5.1	III	III-4A23	cup-5	Tested	No Canal Phenotype						1
71	R107.1	III	III-4J02	nac-2	Tested	No Canal Phenotype						1
72	F09G8.9	III	III-4K22	mps-4	Tested	No Canal Phenotype						1
73	F44B9.10	III	III-4O23		Tested	No Canal Phenotype						1
74	K11D9.3	III	III-5D04		Tested	No Canal Phenotype						1
75	K11H3.1	III	III-5E02	gpdh-2	Tested	No Canal Phenotype						1
76	F55H2.1	III	III-5E21	sod-4	Tested	No Canal Phenotype						1
77	T16H12.9	III	III-5M20		Tested	No Canal Phenotype						1
78	Y47D3A.15	III	III-5P06	aakb-2	Tested	No Canal Phenotype						1
79	T05D4.3	III	III-6B22	exc-12	Tested	Canal Phenotype			1
80	T25C8.1	III	III-6D06	exc-10	Tested	Canal Phenotype			1
80	T25C8.1	III	III-8C16		Tested	Lethal		1	-	-	-	-	-	-	-
81	Y41C4A.12	III	III-6E21		Tested	No Canal Phenotype						1
82	Y111B2A.8	III	III-6I04	aakg-1	Tested	No Canal Phenotype						1
82	Y111B2A.8	III	III-6I06	aakg-1	Tested	No Canal Phenotype		1	-	-	-	-	-	-	-
82	Y111B2A.8	III	III-9A12	aakg-1	Tested	No Canal Phenotype		1	-	-	-	-	-	-	-
83	Y55B1BL.1	III	III-7G08		No Bacterial Growth	Not Attempted								1
84	Y75B8A.26	III	III-8A15	mrp-8	Tested	No Canal Phenotype						1
85	C05D10.4	III	III-8E09		Tested	No Canal Phenotype						1
86	ZK688.10	III	III-8G12		Tested	No Canal Phenotype						1
87	Y47D3B.11	III	III-8H06	plr-1	Tested	No Canal Phenotype						1
88	T02C1.2	III	III-8M08		Tested	No Canal Phenotype						1
89	C35B1.5	IV	IV-10B15		Tested	No Canal Phenotype						1
90	F20D12.5	IV	IV-10B16	exc-9	Tested	No Canal Phenotype						1
91	C50A2.3	IV	IV-1I18		Tested	No Canal Phenotype						1
92	C09G12.8a	IV	IV-1J04	ced-10	Tested	No Canal Phenotype						1
93	R05C11.3	IV	IV-1J15	mca-2	No Bacterial Growth	Not Attempted								1
94	W03D2.5	IV	IV-2E05	wrt-5	Tested	No Canal Phenotype						1
95	C10G6.1	IV	IV-3A19	egal-1	Tested	Canal Phenotype			1
96	F55G1.15	IV	IV-3D10		Tested	No Canal Phenotype						1
97	R05G6.6	IV	IV-3D22	glt-6	Tested	No Canal Phenotype						1
98	R13A1.2	IV	IV-3H09	kcc-1	Tested	No Canal Phenotype						1
98	R13A1.2	IV	IV-3H17	kcc-1	Tested	No Canal Phenotype		1	-	-	-	-	-	-	-
98	R13A1.2	IV	IV-3H19	kcc-1	Tested	No Canal Phenotype		1	-	-	-	-	-	-	-
99	D1046.4	IV	IV-4H01		Tested	No Canal Phenotype						1
100	C53B4.1	IV	IV-4H05	suex-2	Tested	Suppressor for exc-5							1
101	F42G8.11	IV	IV-4I15	sph-1	Tested	No Canal Phenotype						1
102	F56H11.2	IV	IV-4N20		Tested	No Canal Phenotype						1
103	F35H10.4	IV	IV-4O13	vha-5	Tested	Canal Phenotype			1
104	C33D9.1	IV	IV-4O24	exc-5	Control	Canal Phenotype									1
105	T05A1.5	IV	IV-4P10		Tested	No Canal Phenotype						1
105	T05A1.5	IV	IV-4P12		Tested	No Canal Phenotype		1	-	-	-	-	-	-	-
105	T05A1.5	IV	IV-4P16		Tested	No Canal Phenotype		1	-	-	-	-	-	-	-
106	F27C8.1	IV	IV-4P18	aat-1	Tested	No Canal Phenotype						1
107	F27C8.2	IV	IV-4P20		Tested	No Canal Phenotype						1
108	W09C2.3	IV	IV-5A07	mca-1	Tested	No Canal Phenotype						1
109	W01B6.3	IV	IV-5C04		Tested	No Canal Phenotype						1
110	K08F4.4	IV	IV-5G22	glt-3	Tested	No Canal Phenotype						1
111	F32B6.9	IV	IV-5K21	best-13	Tested	No Canal Phenotype						1
112	F44D12.2	IV	IV-5O13		Tested	No Canal Phenotype						1
112	F44D12.2	IV	IV-5O15		Tested	No Canal Phenotype		1	-	-	-	-	-	-	-
113	C06G8.3	IV	IV-5P11		Tested	No Canal Phenotype						1
114	F54D1.4	IV	IV-6C03	nhr-7	Tested	No Canal Phenotype						1
115	F54D1.5	IV	IV-6C05	gtl-2	Tested	No Canal Phenotype						1
116	H01G02.1	IV	IV-6C24		Tested	No Canal Phenotype						1
117	K08E4.3	IV	IV-6M04		Tested	No Canal Phenotype						1
118	ZK795.1	IV	IV-6N21		Tested	No Canal Phenotype						1
119	C39E9.2	IV	IV-6P06	scl-5	Tested	No Canal Phenotype						1
120	C39E9.7	IV	IV-6P16		Tested	No Canal Phenotype						1
121	B0564.3	IV	IV-7A11	best-1	Tested	No Canal Phenotype						1
122	Y37A1A.3	IV	IV-7I12		Tested	No Canal Phenotype						1
123	Y45F10A.3	IV	IV-7M07	afmd-2	No Bacterial Growth	Not Attempted								1
124	Y55F3BR.6	IV	IV-8N07		Tested	No Canal Phenotype						1
124	Y55F3BR.6	IV	IV-8N05		No Bacterial Growth	Not Attempted		1	-	-	-	-	-	-	-
125	ZC168.1	IV	IV-9A13	ncx-3	Tested	No Canal Phenotype						1
126	H32C10.2	IV	IV-9D19	lin-33	Tested	No Canal Phenotype						1
127	Y37E11AR.5	IV	IV-9E06	ugt-45	Tested	No Canal Phenotype						1
128	C34D4.9	IV	IV-9F07	nas-8	Tested	No Canal Phenotype						1
129	Y51H4A.3	IV	IV-9L11	rho-1	Tested	Lethal
130	K08F4.12	IV	IV-9P14		Tested	No Canal Phenotype						1
131	T06C12.10	V	V-10D05	cgt-1	Tested	No Canal Phenotype						1
132	C55A1.6	V	V-10E06		Tested	No Canal Phenotype						1
133	F11A5.13	V	V-10H10		Tested	No Canal Phenotype						1
134	C18D4.4	V	V-11B16		Tested	No Canal Phenotype						1
135	Y59A8B.23	V	V-11L08	gck-3	Tested	Canal Phenotype			1
135	Y59A8B.23	V	V-11L10	gck-3	Tested	Canal Phenotype		1	-	-	-	-	-	-	-
136	Y43F8C.7	V	V-12J11		Tested	No Canal Phenotype						1
137	Y51A2D.5	V	V-12K03	hmit-1.2	Tested	No Canal Phenotype						1
138	Y39B6A.27	V	V-12K06		Tested	No Canal Phenotype						1
139	Y39B6A.29	V	V-12K08		Tested	No Canal Phenotype						1
140	T13F3.5	V	V-14C12	fbxa-2	Tested	No Canal Phenotype						1
141	Y43F8C.12	V	V-14E13	mrp-7	Tested	No Canal Phenotype						1
142	K11D12.9	V	V-14L15	exc-14	Tested	Canal Phenotype			1
143	T01G6.2	V	V-14N17	nhr-131	Tested	No Canal Phenotype						1
144	B0222.3	V	V-15G14	pitr-3	Tested	No Canal Phenotype						1
145	T28A11.11	V	V-15P06	gst-23	Tested	No Canal Phenotype						1
145	T28A11.11	V	V-2N04	gst-23	Tested	No Canal Phenotype		1	-	-	-	-	-	-	-
146	T22F3.6	V	V-15P09	srh-212	Tested	No Canal Phenotype						1
147	C03G6.5	V	V-16K12	exc-13	Tested	Canal Phenotype			1
148	F59D6.7	V	V-2B12	chpf-2	Tested	No Canal Phenotype						1
149	K02G10.7	V	V-2D20	aqp-8	Tested	No Canal Phenotype						1
150	T08H10.1	V	V-3B06	exc-15	Tested	Canal Phenotype			1
151	R08F11.1	V	V-3C24		Tested	No Canal Phenotype						1
152	T24A6.20	V	V-3M15		No Bacterial Growth	Not Attempted								1
153	T22F3.7	V	V-3O19		Tested	No Canal Phenotype						1
154	C24G6.2	V	V-4C14		Tested	No Canal Phenotype						1
155	C18C4.2	V	V-4E06	cft-1	Tested	No Canal Phenotype						1
156	M03E7.2	V	V-4G18		Tested	No Canal Phenotype						1
157	T10H9.1	V	V-4J08		Tested	No Canal Phenotype						1
158	F44E7.6	V	V-4M12	fbxa-183	Tested	Canal Phenotype			1
158	F44E7.6	V	V-4M14	fbxa-183	Tested	Canal Phenotype		1	-	-	-	-	-	-	-
159	F44E7.8	V	V-4M16	nhr-142	Tested	No Canal Phenotype						1
160	F19F10.3	V	V-5B13		Tested	No Canal Phenotype						1
161	T19F4.1	V	V-5C05	frpr-18	Tested	No Canal Phenotype						1
162	C33G8.5	V	V-5E15	srab-4	Tested	No Canal Phenotype						1
163	C03G6.17	V	V-5G10		Tested	No Canal Phenotype						1
164	T05B11.4	V	V-5L01		Tested	No Canal Phenotype						1
165	C08D8.2	V	V-6A03	tmd-2	Tested	No Canal Phenotype						1
166	B0507.9	V	V-6C02		Tested	No Canal Phenotype						1
167	F40F9.2	V	V-6D18	tag-120	Tested	No Canal Phenotype						1
168	C25E10.5	V	V-6K06		Tested	No Canal Phenotype						1
169	F57A8.7	V	V-7A19		Tested	No Canal Phenotype						1
170	F22E12.2	V	V-7A20	chw-1	Tested	No Canal Phenotype						1
171	F58B4.1	V	V-7B19	nas-31	Tested	No Canal Phenotype						1
172	Y32F6B.3	V	V-7C06	crp-1	Tested	No Canal Phenotype						1
173	Y32F6B.3	V	V-7C06	crp-1	Tested	No Canal Phenotype		1	-	-	-	-	-	-	-
174	F17C11.12	V	V-7D03		Tested	No Canal Phenotype						1
175	F32G8.3	V	V-7E16		Tested	No Canal Phenotype						1
176	C51E3.6	V	V-7E23		Tested	No Canal Phenotype						1
177	F53B7.7	V	V-7F03		Tested	No Canal Phenotype						1
178	R31.1	V	V-8C09	sma-1	Control	Canal Phenotype									1
179	F32H5.4	V	V-8H02		Tested	No Canal Phenotype						1
180	T07F10.1	V	V-8H09		Tested	No Canal Phenotype						1
181	C27A7.3	V	V-8K19		Tested	No Canal Phenotype						1
182	F53F4.1	V	V-8P10		Tested	No Canal Phenotype						1
183	F53F4.6	V	V-8P20	rdy-2	Tested	No Canal Phenotype						1
184	F58G11.4	V	V-9A23		Tested	No Canal Phenotype						1
185	F47B8.8	V	V-9M20		Tested	No Canal Phenotype						1
186	M6.1	X	X-1G15	ifc-2	Control	Canal Phenotype									1
187	T19D7.7	X	X-1I11		Tested	No Canal Phenotype						1
188	ZK563.6	X	X-2A10	acp-1	Tested	No Canal Phenotype						1
189	T06F4.2	X	X-2D07	clh-4	Tested	No Canal Phenotype						1
190	K02G10.8	X	X-2D22	dnj-14	Tested	No Canal Phenotype						1
191	F20B6.2	X	X-2F09	vha-12	No Bacterial Growth	Not Attempted								1
192	K05B2.3	X	X-2J08	ifa-4	Control	Canal Phenotype									1
193	H28G03.6	X	X-3A07	mtm-5	Tested	No Canal Phenotype						1
194	C54D1.4	X	X-3B14	alh-10	Tested	No Canal Phenotype						1
194	C54D1.4	X	X-3B18	alh-10	Tested	No Canal Phenotype		1	-	-	-	-	-	-	-
195	F46H5.3	X	X-3D18		Tested	No Canal Phenotype						1
196	F35C8.6	X	X-3E05	pfn-2	Tested	No Canal Phenotype						1
197	C45B2.8	X	X-3E06		Tested	No Canal Phenotype						1
198	T13C5.4	X	X-3I10	ceh-54	Tested	No Canal Phenotype						1
199	C14F11.5	X	X-3I24	hsp-43	Tested	No Canal Phenotype						1
200	W01C8.1	X	X-3K11		Tested	No Canal Phenotype						1
201	C01C10.3	X	X-3L02	acl-12	Tested	No Canal Phenotype						1
202	F46C8.1	X	X-3L24		Tested	No Canal Phenotype						1
203	F46G11.2	X	X-3M21		Tested	No Canal Phenotype						1
204	F49E2.1	X	X-4B24		Tested	No Canal Phenotype						1
205	R09F10.4	X	X-4C02	inx-5	Tested	No Canal Phenotype						1
206	F40B5.2	X	X-4E04		Tested	No Canal Phenotype						1
207	F16F9.1	X	X-4G08		Tested	No Canal Phenotype						1
208	F48C5.1	X	X-5B17	igeg-2	Tested	No Canal Phenotype						1
209	T21B6.2	X	X-5C22	pho-7	Tested	No Canal Phenotype						1
210	F41E7.1	X	X-5E01	exc-11	Tested	Canal Phenotype			1
211	F41E7.2	X	X-5E03		Tested	No Canal Phenotype						1
212	F52D10.1	X	X-5F03	abts-2	Tested	No Canal Phenotype						1
213	R07E3.7	X	X-5G05		Tested	No Canal Phenotype						1
214	R07A4.4	X	X-5O13		Tested	No Canal Phenotype						1
214	R07A4.4	X	X-8L12		Tested	No Canal Phenotype		1	-	-	-	-	-	-	-
215	ZK455.7	X	X-8A21	pgp-3	Tested	No Canal Phenotype						1
215	ZK455.7	X	X-5O16	pgp-3	No Bacterial Growth	Not Attempted		1	-	-	-	-	-	-	-
216	F42E11.1	X	X-5O20	pgp-4	Tested	No Canal Phenotype						1
216	F42E11.1	X	X-8A22	pgp-4	Tested	No Canal Phenotype		1	-	-	-	-	-	-	-
217	F48F7.2	X	X-6D17	syx-2	Tested	No Canal Phenotype						1
217	C09F12.3	X	X-8B03		Tested	Prob. Canal Phenotype				1
218	C46E1.3	X	X-8B08	exc-1	Control	Canal phenotype									1
218	F02C12.1	X	X-6E02		Tested	No Canal Phenotype						1
219	R01E6.3	X	X-6I20	cah-4	Tested	No Canal Phenotype						1
219	Y34B4A.4	X	X-8D15		Tested	No Canal Phenotype						1
220	R03E1.1	X	X-6J15	sym-4	Tested	No Canal Phenotype						1
220	C35C5.4	X	X-8F03	mig-2	Tested	No Canal Phenotype						1
221	C37E2.5	X	X-6L05	ceh-37	Tested	Canal Phenotype			1
221	R02E4.3	X	X-8I06		Tested	No Canal Phenotype						1
222	F09A5.2	X	X-6M11		Tested	No Canal Phenotype						1
223	F55F3.1	X	X-6O16	aakb-1	Tested	No Canal Phenotype						1
224	T01C8.1	X	X-7D05	aak-2	Tested	No Canal Phenotype						1
225	F39D8.4	X	X-7I01	nas-13	Tested	No Canal Phenotype						1
226	K09A9.3	X	X-7K19	ent-2	Tested	No Canal Phenotype						1
